# Supplementary material for: Rab GTPases and phosphoinositides fine-tune SNAREs dependent targeting specificity of intracellular vesicle traffic
Source: PubMed Central journal article supplement (PMC10954720; doi:10.1038/s41467-024-46678-x), 2024-03-20
Supplement: 41467_2024_46678_MOESM1_ESM.pdf [file 41467_2024_46678_MOESM1_ESM.pdf]

Supplementary materials for

**Rab GTPases and phosphoinositides fine-tune SNAREs dependent  
targeting specificity of intracellular vesicle traffic**

Seiichi Koike and Reinhard Jahn

**This file includes:**

Figure S1-S6 and legends

**a**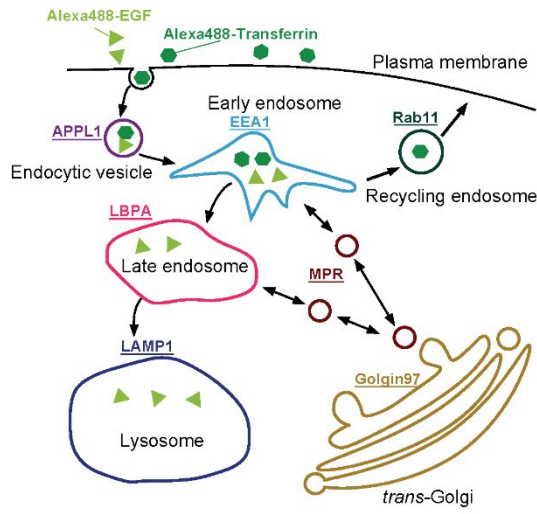**b**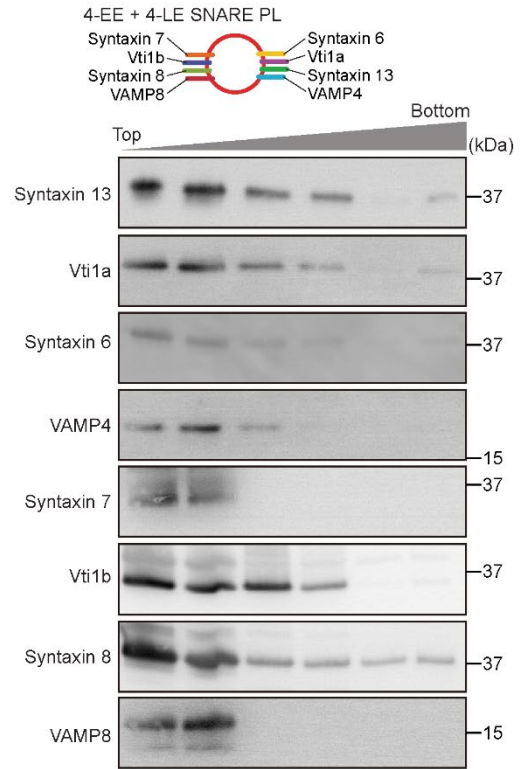**c**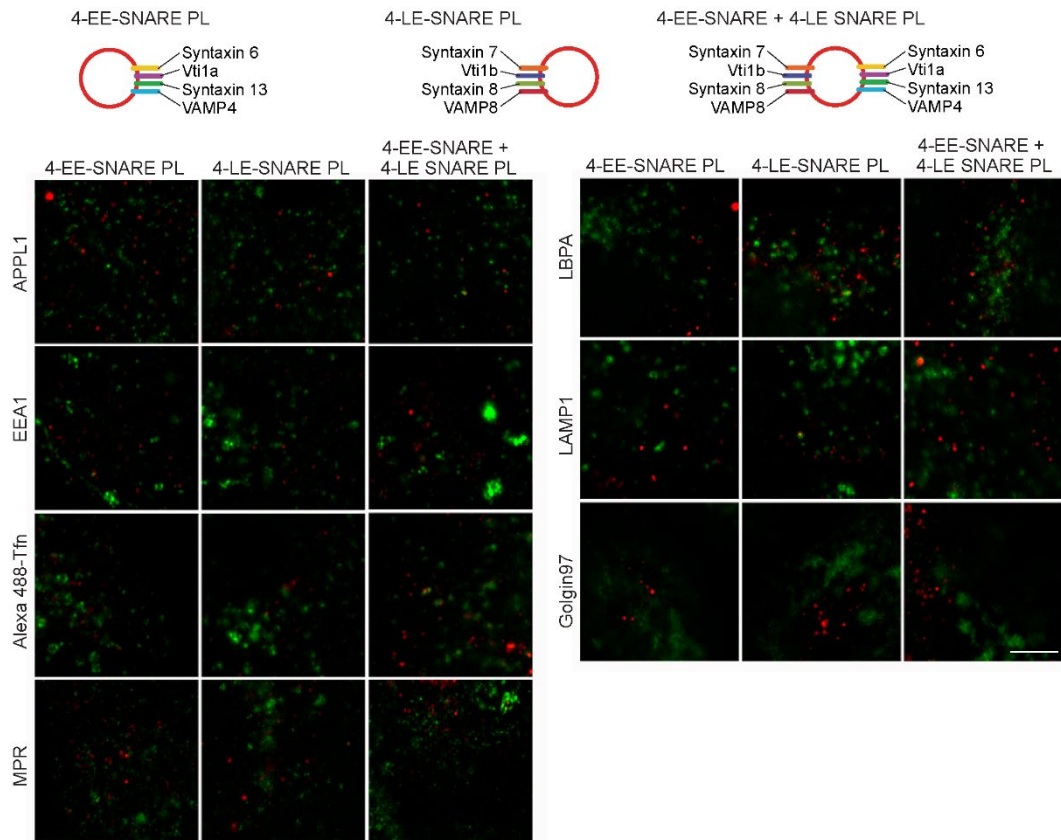

### **Supplementary Figure S1**

(a) Schematic overview showing the organelle-specific markers used in this study. Abbreviations are given in the text.

(b) Analysis of 4-EE + 4-LE-SNARE liposomes by flotation density gradient reveals efficient incorporation of the SNARE proteins. Proteoliposomes were loaded at the bottom in 80% Nycodenz and overlaid with a discontinuous Nycodenz gradient of decreasing density. During centrifugation, membranes such as proteoliposomes migrate to the top whereas non-incorporated proteins remain at the bottom. Fractions recovered from the gradient were analyzed by SDS/PAGE and immunoblotting for the SNARE proteins.

(c) Related to Fig. 1a. Representative confocal microscopy images of HeLa cells fixed 5 min after injection of 4-EE + 4-LE-SNARE liposomes labeled by Rhodamine-PE. Cells were immunolabeled using organelle-specific markers and subsequently detected with Alexa Fluor 488-labeled secondary antibodies or internalized Alexa Fluor 488-labeled Transferrin (Tfn). Scale bar, 5  $\mu\text{m}$ .

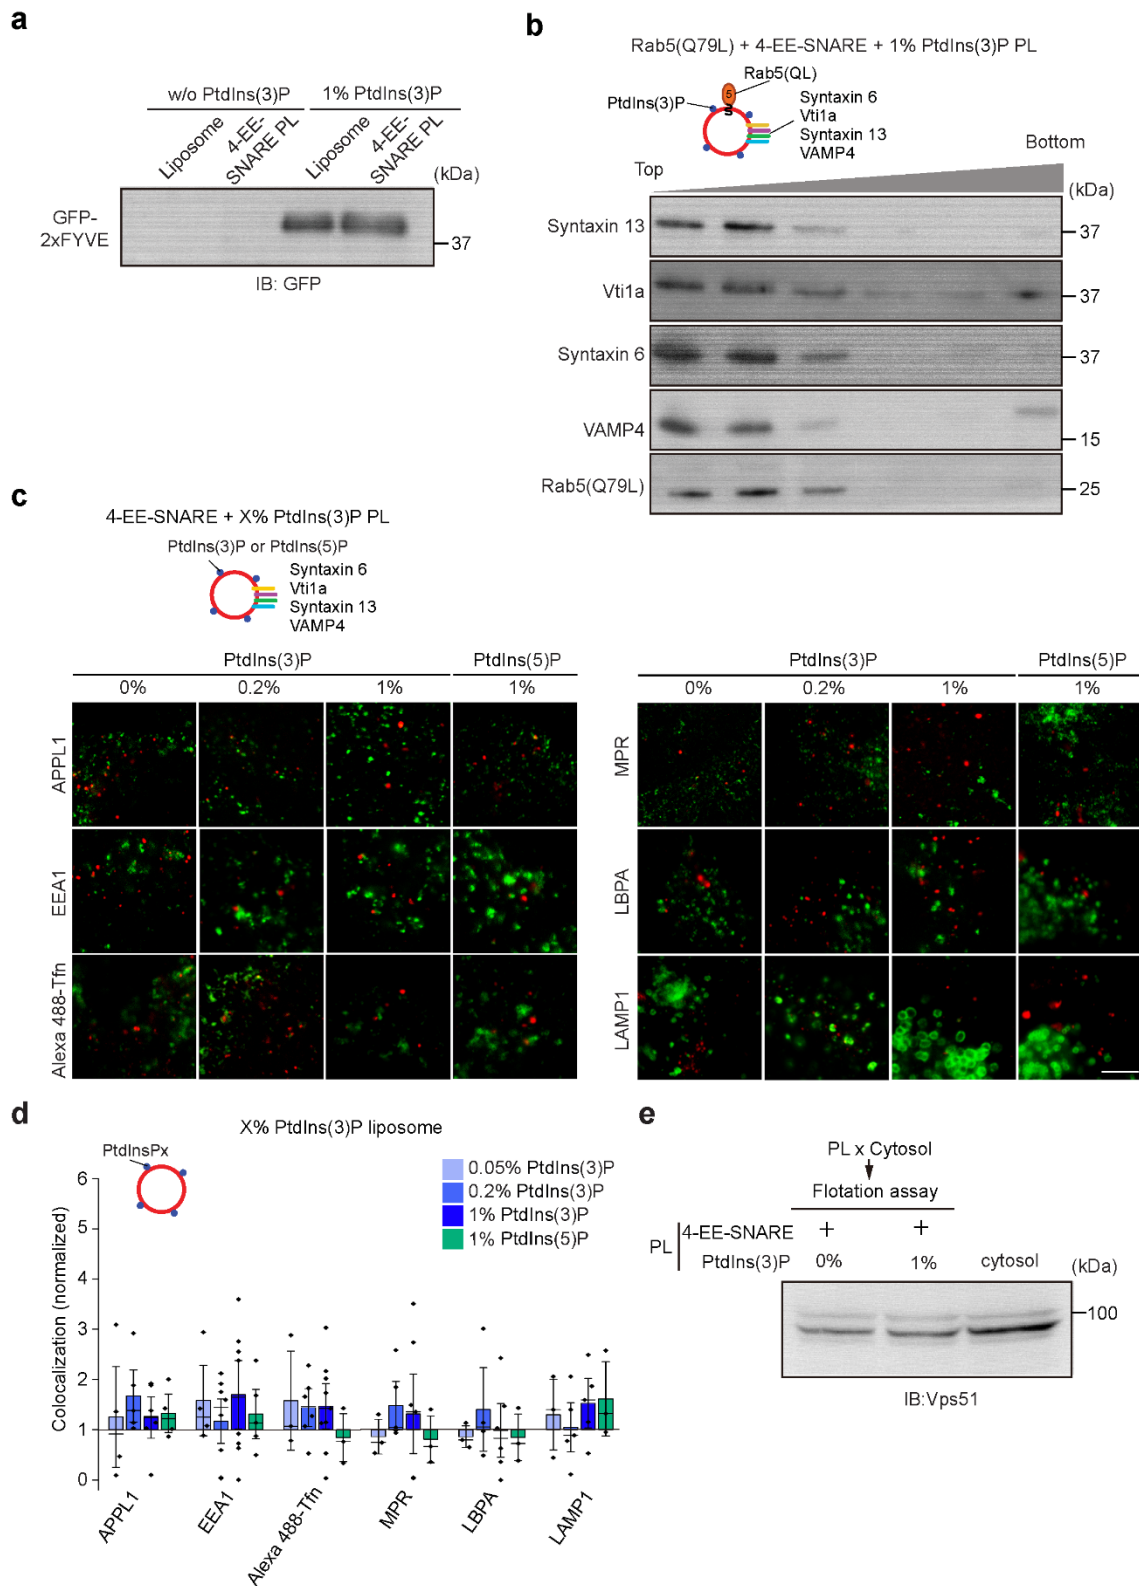

### Supplementary Figure S2

(a) GFP-2xFYVE protein binding to (proteo)liposomes, used as a reporter for the presence of

PtdIns(3)P, reveals efficient membrane incorporation of PtdIns(3)P upon reconstitution. A cytosol fraction obtained from HeLa cells overexpressing GFP-2xFYVE was incubated with versions of liposomes (endosomal membrane lipids) that contained, in addition, the four early endosomal SNARE proteins (4-EE-SNAREs), 1% PtdIns(3)P, or both. Incubation was carried out at 37°C for 30 min. Thereafter, membranes were separated by flotation gradient centrifugation, and the binding of the GFP-2xFYVE reporter protein was detected by immunoblotting (IB) with a GFP antibody.

(b) Flotation gradients of liposomes containing endosomal lipids and reconstituted with SNAREs, 1% PtdIns(3)P, and Rab5(Q79L) show that all proteins are effectively incorporated into the membrane upon reconstitution.

(c) Related to Fig. 2a. Representative confocal microscopy images of HeLa cells fixed 5 min after injection of 4-EE-SNARE liposomes with various concentration of PtdIns(3)P or PtdIns(5)P. Cells were immunolabeled for organelle markers or internalized Alexa Fluor 488-labeled Transferrin (Tfn). Scale bar, 5  $\mu$ m.

(d) Colocalization between injected liposomes containing PtdIns(3)P or PtdIns(5)P with endogenous markers. All values were normalized to the degree of colocalization observed in control injections using protein-free liposomes without any PtdInsPx. The data represent mean values  $\pm$  SEM of 3-9 independent experiments, with each individual measurement being represented by a black dot. at least 100 injected vesicles were analyzed for the colocalization with each organelle marker in each experiment. The data were evaluated by 1-way ANOVA with the Tukey multiple comparison test. No significant colocalization was observed.

(e) A cytosolic fraction obtained from HeLa cells was incubated with either 0% or 1% PtdIns(3)P containing liposomes reconstituted with 4-EE-SNAREs. Subsequently, unbound proteins were separated using a flotation gradient. The liposome fraction was then analyzed by immunoblotting for Vps51, showing that binding of Vps51 is not dependent on PtdIns(3)P.

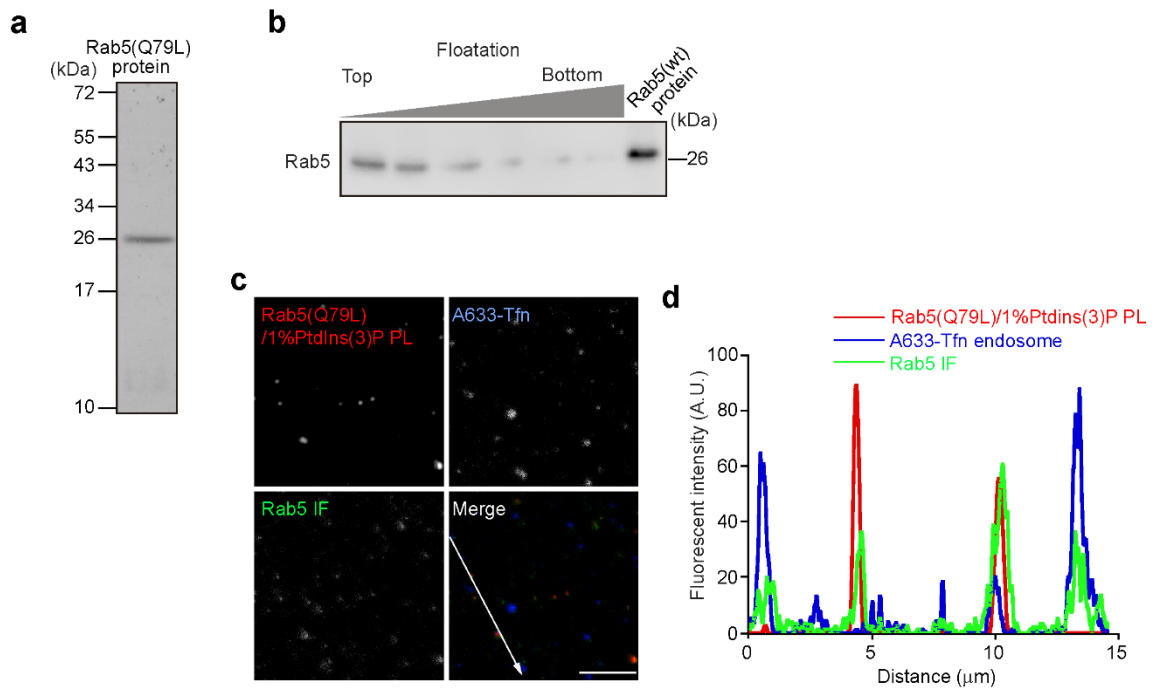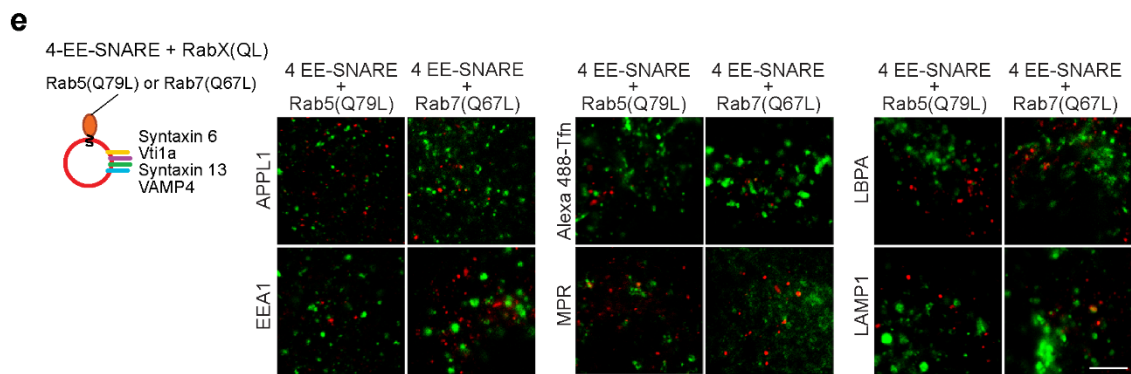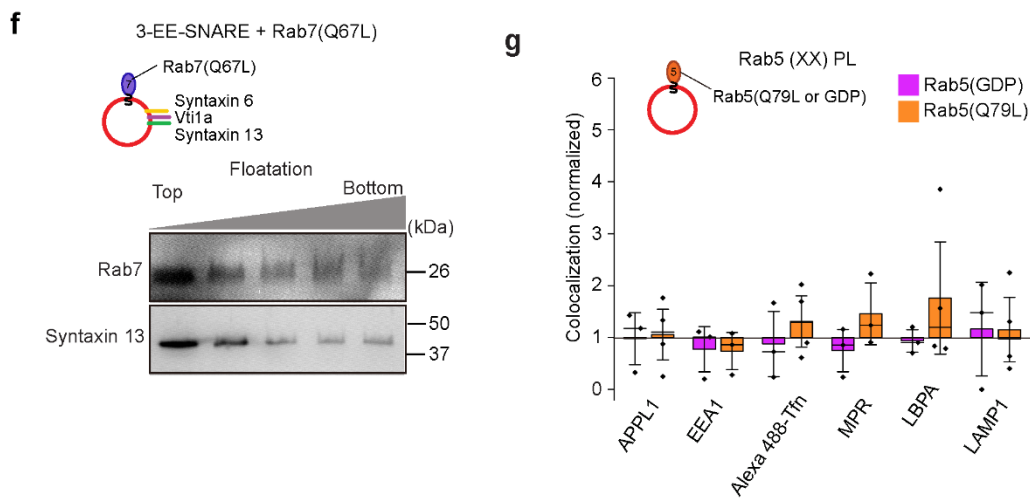

### Supplementary Figure S3

(a) Coomassie brilliant blue staining of an SDS PAGE of purified prenylated-Rab5 (Q79L) protein expressed in Sf9 cells.

(b) Flotation gradients of liposomes containing endosomal lipids and reconstituted with purified wt-Rab5, confirming that the protein is quantitatively incorporated into liposomes.

(c-d) Comparison of Rab5 protein levels between injected Rab5(Q79L) reconstituted liposomes and endogenous endosomes. (c) To label early endosomes, Alexa Fluor 633-Transferrin (Tfn) was internalized for 10 min, and then Rab5(Q79L) proteoliposomes containing 1% PtdIns(3)P were microinjected followed by immunostaining (IF) with anti-Rab5 antibody. Scale bar, 5  $\mu$ m. (d) An intensity plot of the line scan (a white line) in the pictures on (c).

(e) Related to Fig. 2c. Colocalization between organellar markers and injected liposomes containing the 4-EE-SNAREs and prenylated Rab5(Q79L) or prenylated Rab7(Q67L). Cells were immunolabeled for organelle markers. Scale bar, 5  $\mu$ m.

(f) Flotation gradients of liposomes reconstituted with purified Rab7(Q67L) and 3-EE-SNAREs. Protein distribution was detected by immunoblotting using anti-Rab7 or anti-Syntaxin 13-specific antibodies.

(g) Colocalization between Rab5 (GDP) or Rab5 (Q79L) containing liposomes with endogenous markers. All values were normalized to the degree of colocalization observed in control injections using protein-free liposomes. The data represent mean values  $\pm$  SEM of 3-4 independent experiments, with each individual measurement being represented by a black dot. at least 100 injected vesicles were analyzed for the colocalization with each organelle marker in each experiment. The data were evaluated by 1-way ANOVA with the Tukey multiple comparison test. No significant colocalization was observed.

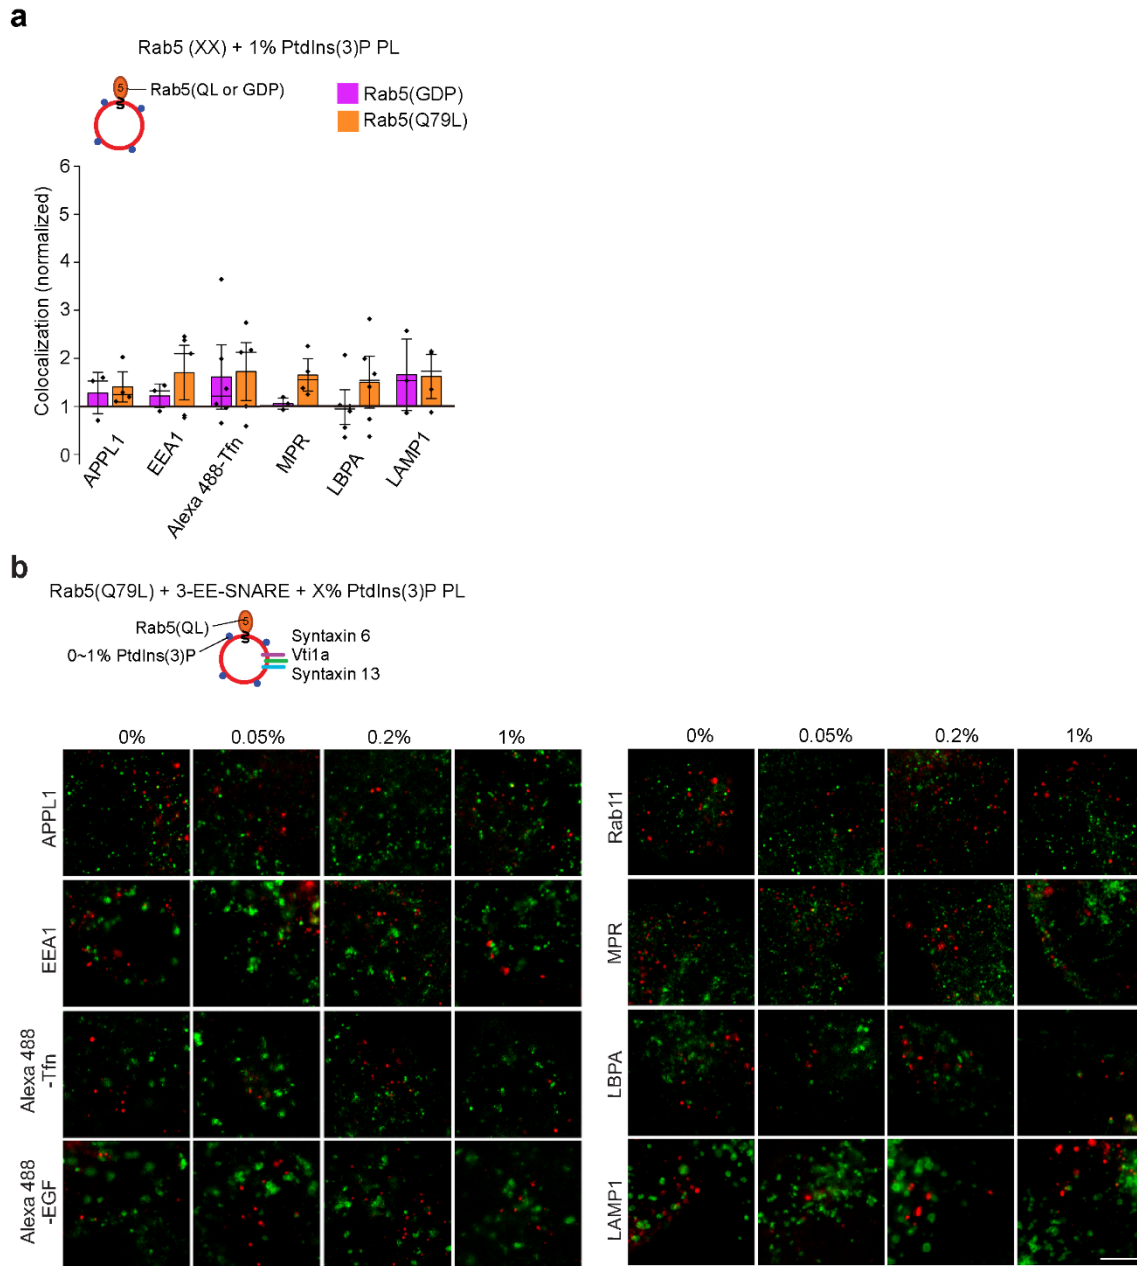

#### Supplementary Figure S4

(a) Colocalization between Rab5 (GDP) or Rab5 (Q79L) and 1% PtdIns(3)P containing liposomes with endogenous markers. All values were normalized to the degree of colocalization observed in control injections using protein-free liposomes. The data represent mean values  $\pm$  SEM of 3-6 independent experiments, with each individual measurement being represented by a black dot. at least 100 injected vesicles were analyzed for the colocalization with each organelle marker in each experiment. The data were evaluated by 1-way ANOVA with the Tukey multiple comparison test. No significant colocalization was observed.

(b) Related to Fig. 3b. Representative confocal microscopy images of HeLa cells fixed 5 min after injection of 4-EE-SNARE and Rab5(Q79L) liposomes containing various concentration of PtdIns(3)P. Cells were immunolabeled for organelle markers. Scale bar, 5  $\mu$ m.



**a**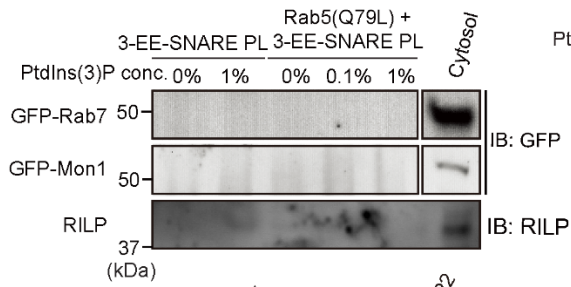**d**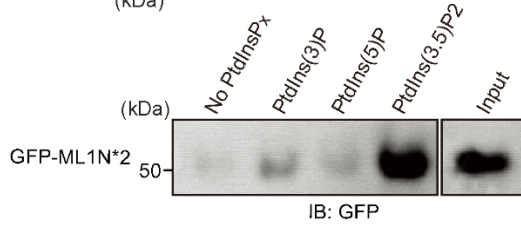**e**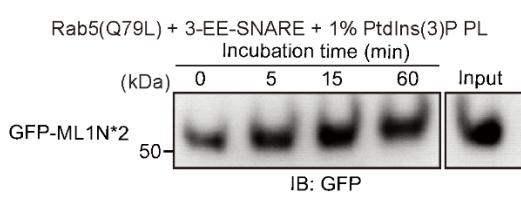**f**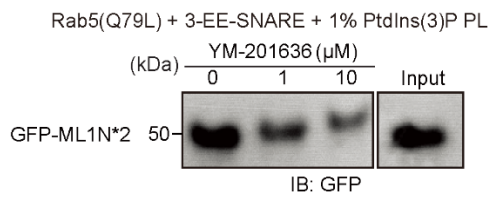**g**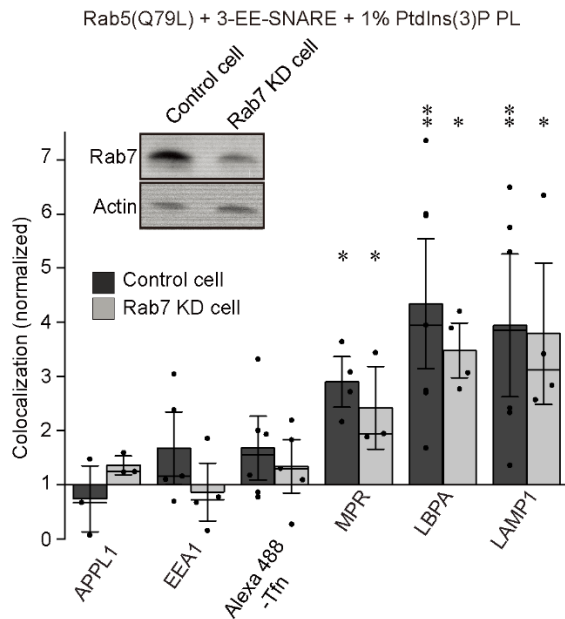**b**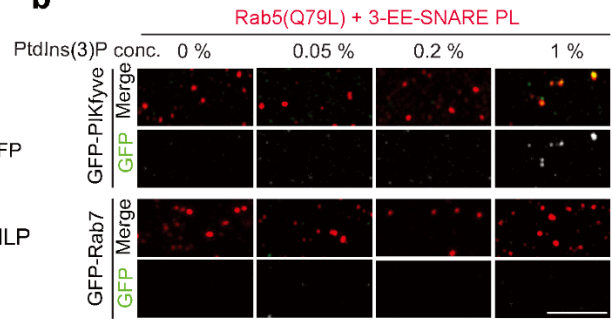**c**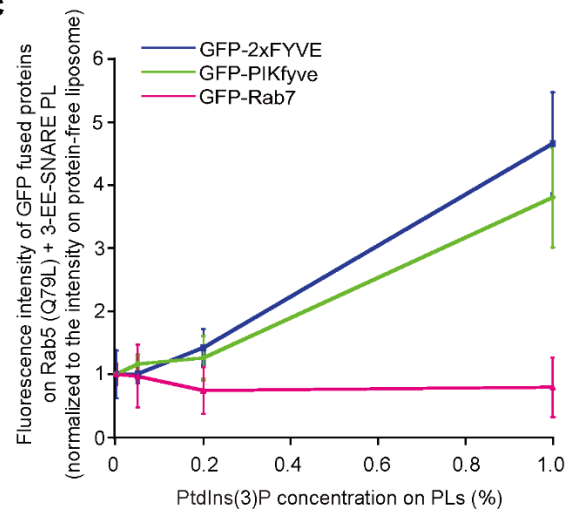**h**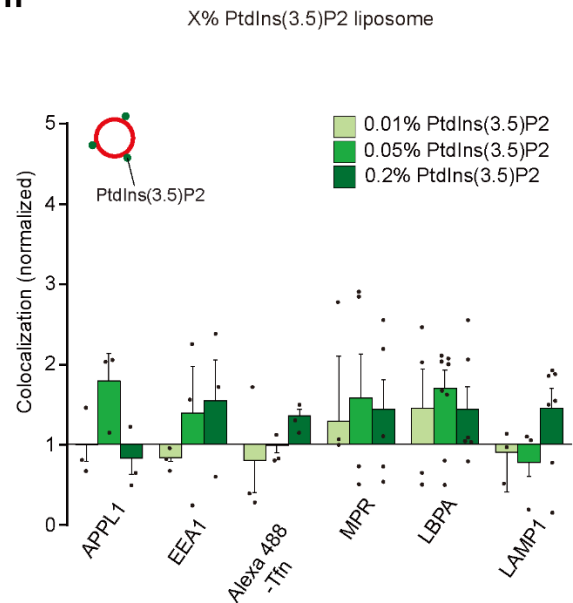

## Supplementary Figure S5

(a) Neither GFP-Rab7, GFP-Mon1 nor endogenous RILP was recruited to proteoliposomes reconstituted with early endosomal SNAREs and/or Rab5 (Q79L) and various combinations of phosphoinositides. The liposomes (all containing 1% Biotin-PE for subsequent isolation) were incubated with cytosolic extracts from HeLa cells expressing GFP-Rab7 or GFP-Mon1 for 30 min at 37°C. The proteoliposomes were precipitated with Streptavidin-conjugated beads, and recruited proteins were detected by immunoblotting with an anti-GFP antibody.

(b-c) Microscopy-based detection of protein recruitment to liposomes. Proteoliposomes reconstituted with EE-SNAREs, Rab5 (Q79L) and various combinations of phosphoinositides were incubated with a cytosolic fraction from HeLa cells overexpressing GFP-tagged proteins. The liposomes were then immobilized on coverslips, and the recruited proteins were detected by immunostaining with anti-GFP antibody. (b) Representative images of the recruitment of GFP-PIKfyve or GFP-Rab7. Scale bar, 5  $\mu$ m. (c) Quantification of protein recruitment to the liposomal membrane. The fluorescence intensity of GFP on liposomes was calculated and normalized to the intensity of cytosol containing GFP. GFP-2xFYVE protein was used as a reporter for the concentration of PtdIns(3)P. The data show mean values  $\pm$  SEM of 6 independent experiments.

(d-e) The recruitment of the GFP-ML1N\*2 probe to liposomes was assessed by flotation of protein-liposome mixtures on Nycodenz gradients. (d) GFP-ML1N\*2 specifically associated with PtdIns(3.5)P<sub>2</sub>. Liposomes with or without PtdInsPx were incubated with a GFP-ML1N\*2 containing cytosol fraction for 5 min at 37°C. (e) PtdIns(3.5)P<sub>2</sub> was produced in a time dependent fashion. Liposomes reconstituted with 3-EE-SNAREs, 1% PtdIns(3)P, and Rab5(Q79L) were incubated with GFP-ML1N\*2 expressing cytosol fraction for various times at 37°C. (f) PtdIns(3.5)P<sub>2</sub> conversion was inhibited by YM-201636 in a dose-dependent manner. Liposomes reconstituted with 3-EE-SNAREs, 1% PtdIns(3)P, and Rab5(Q79L) were incubated with GFP-ML1N\*2 expressing cytosol fraction in presence of 1  $\mu$ M or 10  $\mu$ M YM-201636 for 10 min at 37°C.

(g) Targeting of liposomes reconstituted with 3-EE-SNAREs, 1% PtdIns(3)P, and Rab5(Q79L) in control or Rab7 knock-down HeLa cells. Insert shows an immunoblot for Rab7 in a knock-down (KD) cell line. Normalization was carried out using protein-free liposomes containing 1% PtdIns(3)P. The data represent mean values  $\pm$  SEM of 3-6 independent experiments, with each individual measurement being represented by a black dot. At least 100 injected vesicles were analyzed for the colocalization with each organelle marker in each experiment. Significance was determined by 1-way ANOVA with the Tukey multiple comparison test. Stars indicate significance: \*  $P < 0.05$ , \*\*  $P < 0.01$ .

(h) Colocalization between organelle markers and liposomes containing various concentration of PtdIns(3.5)P<sub>2</sub>. No significant colocalization with any of the tested organelle markers was observed. The data represent mean values  $\pm$  SEM of 3-7 independent experiments, with each individual measurement being represented by a black dot. at least 100 injected vesicles were analyzed for the colocalization with each organelle marker in each experiment. The data were evaluated by 1-way ANOVA with the Tukey multiple comparison test.

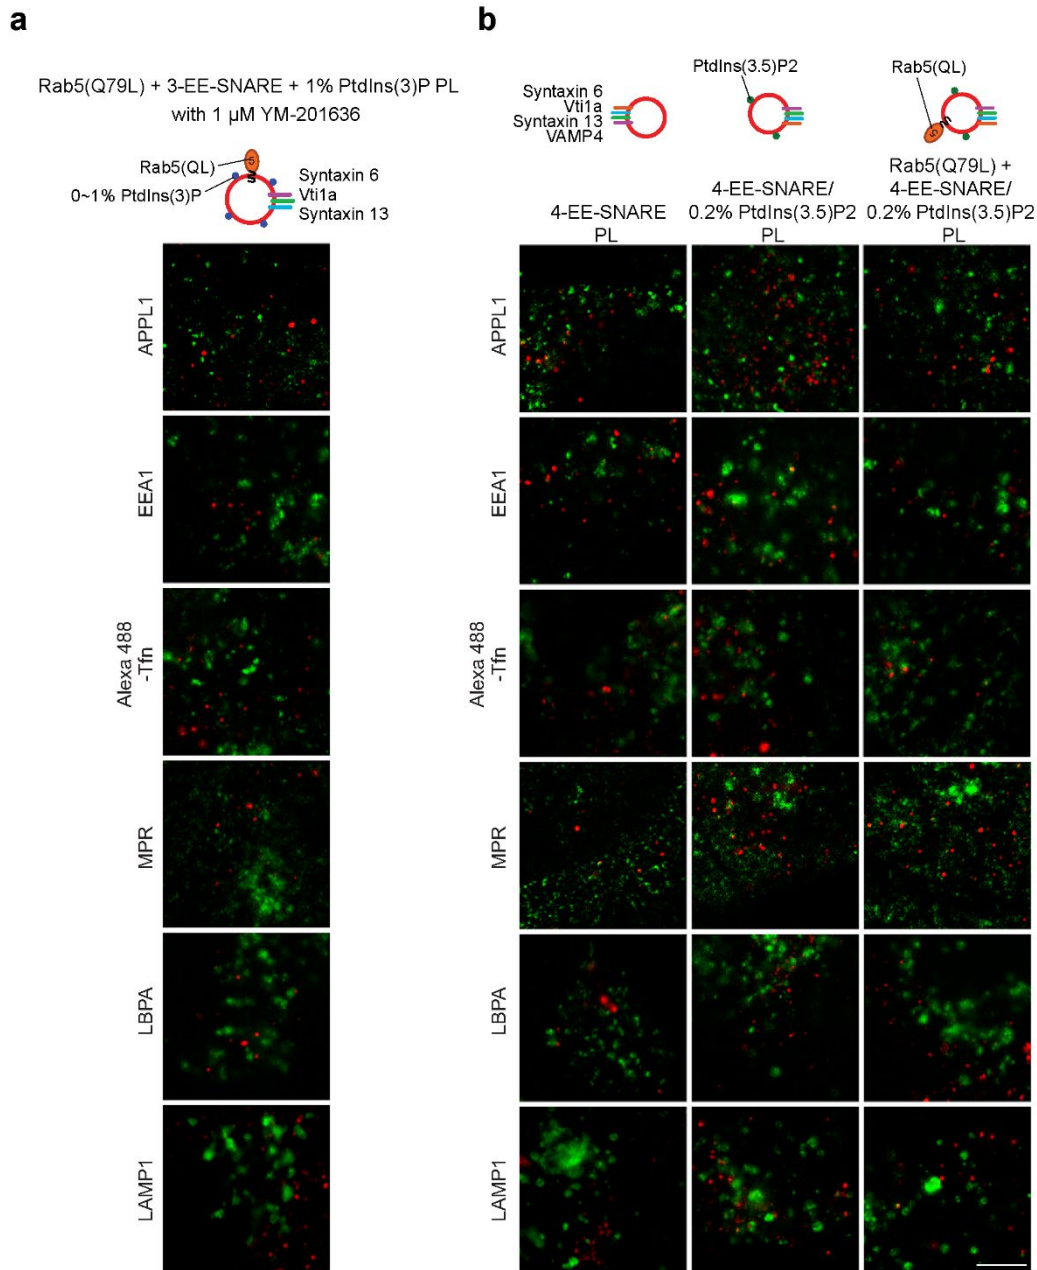

### Supplementary Figure S6

(a) Related to Fig. 5c. Representative confocal microscopy images of HeLa cells fixed 5 min after injection of 3-EE-SNARE and Rab5(Q79L) liposomes with 1% PtdIns(3)P upon treatment with YM-201636, a PIKfyve inhibitor. Cells were immunolabeled for organelle markers. Scale bar, 5  $\mu$ m.

(b) Related to Fig. 5d. Representative confocal microscopy images of HeLa cells fixed 5 min after injection of 3-EE-SNARE and/or Rab5(Q79L) liposomes with 0.2% PtdIns(3.5)P2. Cells were immunolabeled for organelle markers. Scale bar, 5  $\mu$ m.
